# Supplementary material for: The effect of Ge doping concentration on the electrochemical performance of silicene anode for lithium-ion batteries: a first-principles study
Source: Royal Society of Chemistry journal article supplement (doi:10.1039/d3cp02617e), 2023-01-01
Supplement: d3cp02617e1.pdf [file d3cp02617e1.pdf]

**Effect of Ge doping concentration on the electrochemical performance of silicene anode for lithium-ion batteries: a first-principles study**

**Jun Song <sup>a,b,\*</sup>, Mingjie Jiang <sup>a</sup>, Jodie A. Yuwono <sup>b</sup>, Sailin Liu <sup>b</sup>, Jingxiu Wang <sup>b</sup>, Qi Zhang <sup>a</sup>, Yuhui Chen <sup>a</sup>, Jun Zhang <sup>a</sup>, Xuehong Wu <sup>a</sup>, Juanfang Liu <sup>c,\*</sup>**

*<sup>a</sup> College of Energy and Power Engineering, Zhengzhou University of Light Industry, Zhengzhou 450000, Henan, China*

*<sup>b</sup> School of Chemical Engineering & Advanced Materials, The University of Adelaide, Adelaide, SA 5005, Australia*

*<sup>c</sup> School of Energy and Power Engineering, Chongqing University, Chongqing 400044, Chongqing, China*

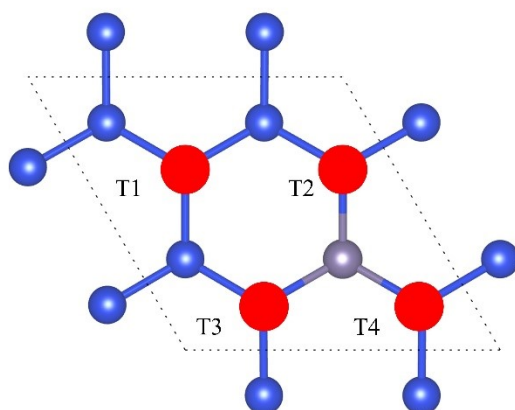

**Figure S1** Possible Li adsorption on the T sites of  $\text{Si}_7\text{Ge}_1$  on the upper surface.

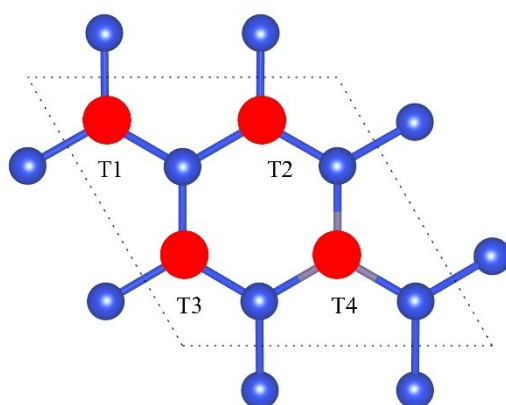

**Figure S2** Possible Li adsorption on the T sites of  $\text{Si}_7\text{Ge}_1$  on the lower surface.

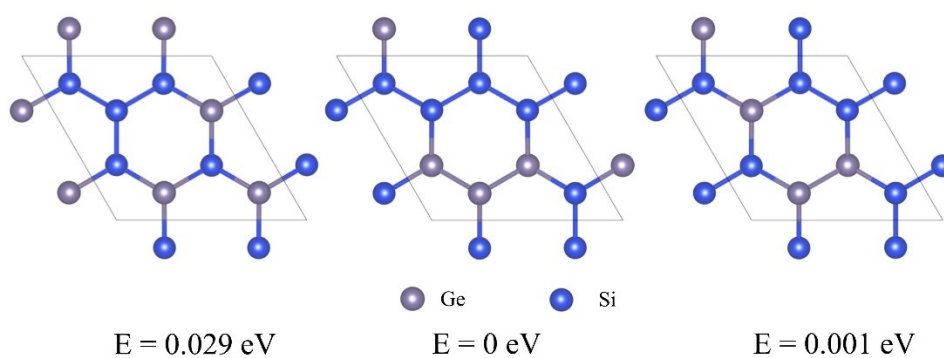

**Figure S3** Top view of three possible configurations of  $\text{Si}_5\text{Ge}_3$ .

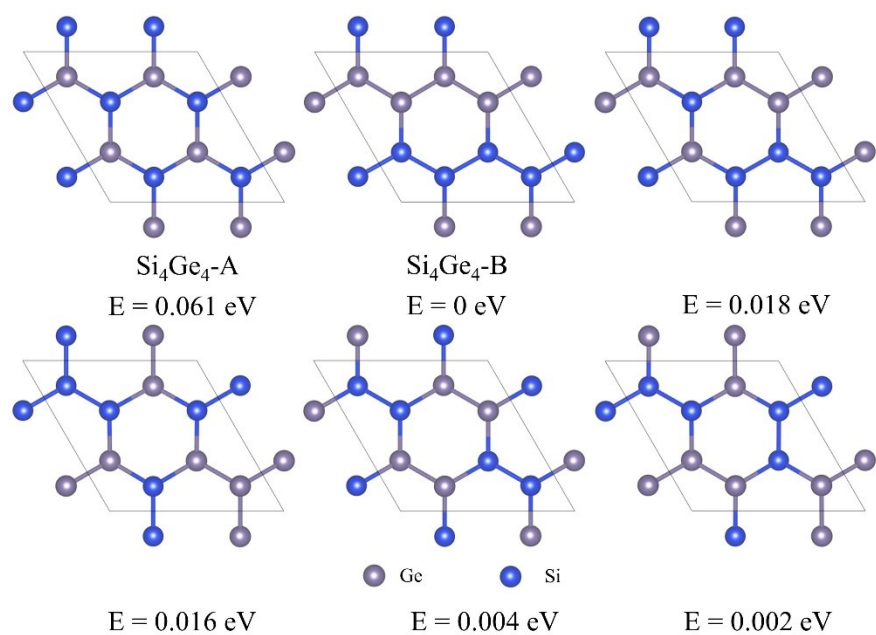

**Figure S4** Top view of six possible configurations of  $\text{Si}_4\text{Ge}_4$ .

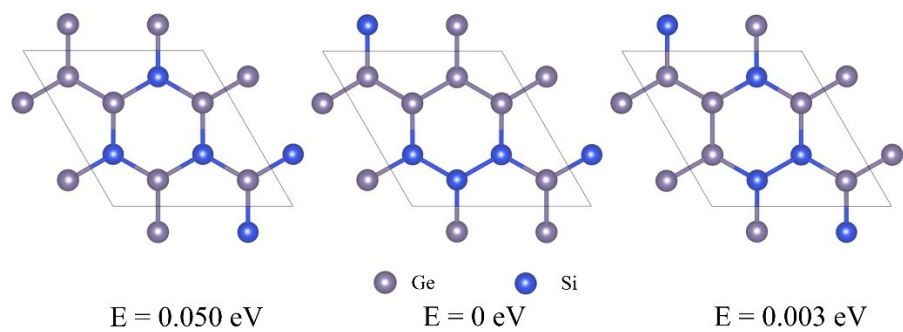

**Figure S5** Top view of three possible configurations of  $\text{Si}_3\text{Ge}_5$ .

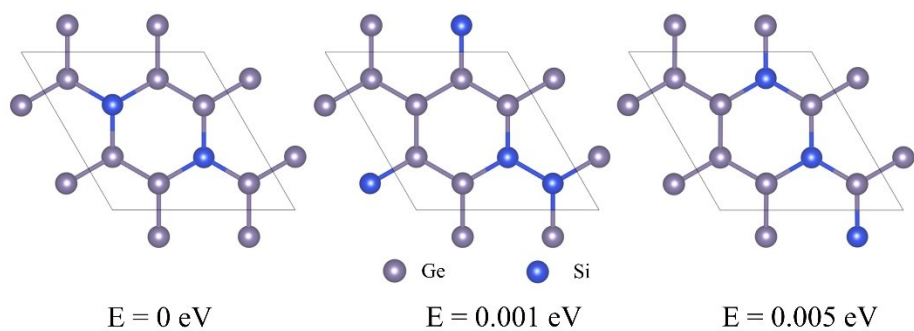

**Figure S6** Top view of three possible configurations of  $\text{Si}_2\text{Ge}_6$ .

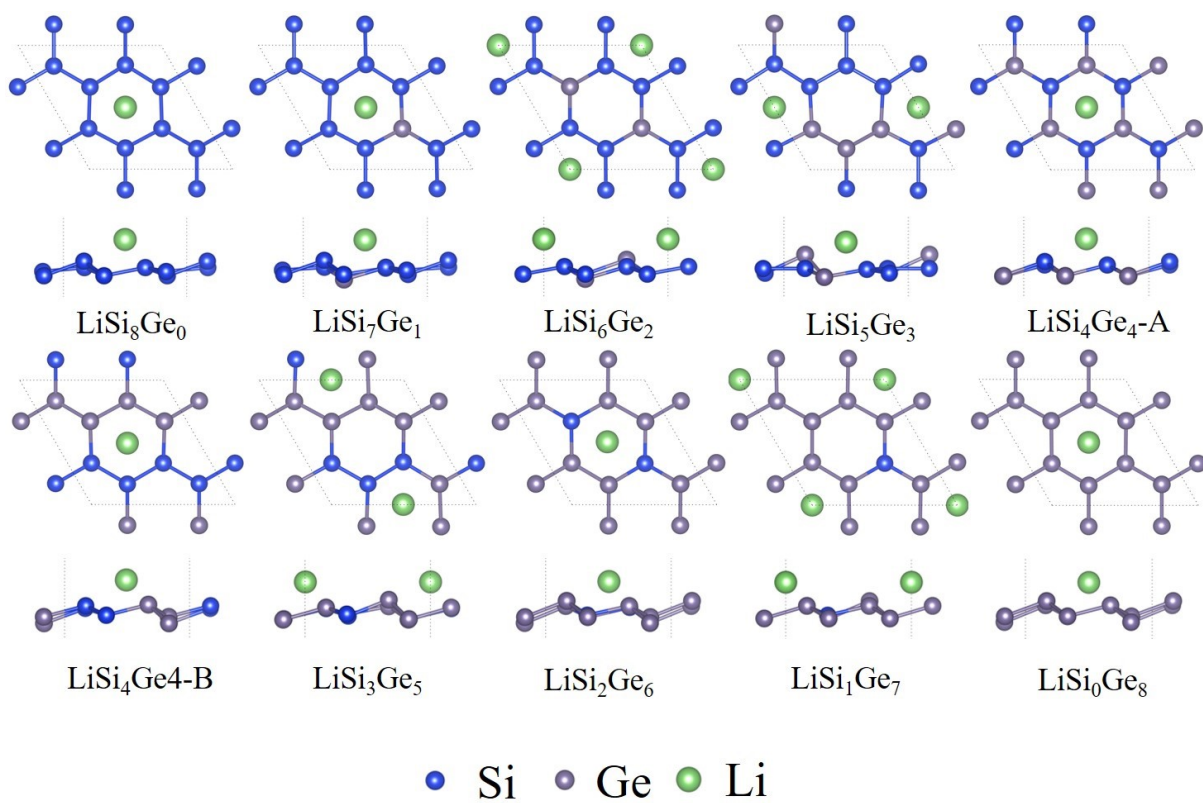

**Figure S7** Top view and side view of Li adsorption on all 2D  $\text{Si}_x\text{Ge}_y$  investigated here.

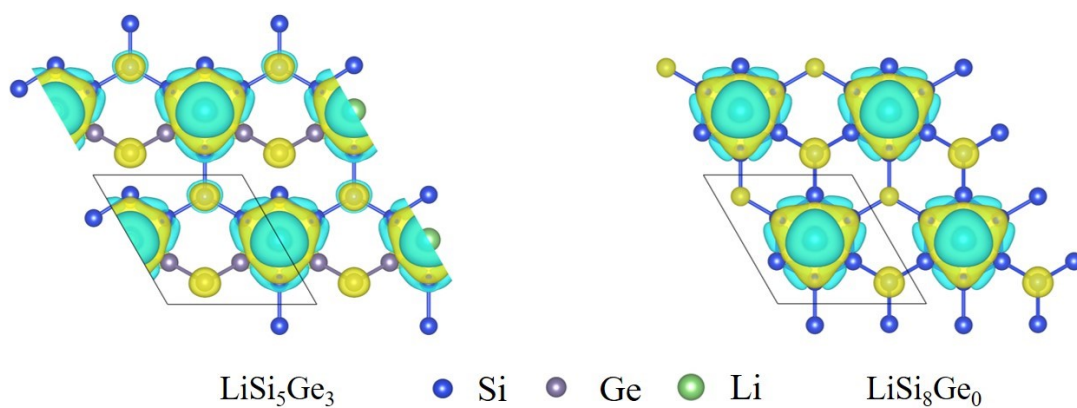

**Figure S8** Charge density difference of  $\text{LiSi}_5\text{Ge}_3$  (left) and  $\text{LiSi}_8\text{Ge}_0$  (right).

Yellow and blue color isosurfaces denotes electron loss and gain, respectively.

**Table S1** Total electronic energies without and with spin polarization correction.

| Structures                         | Energy (eV) |          | $\Delta$ Energy |
|------------------------------------|-------------|----------|-----------------|
|                                    | ISPIN=1     | ISPIN=2  |                 |
| Si <sub>8</sub> Ge <sub>0</sub>    | -38.7747    | -38.7747 | 0.00%           |
| Si <sub>7</sub> Ge <sub>1</sub>    | -37.9633    | -37.9633 | 0.00%           |
| Si <sub>6</sub> Ge <sub>2</sub>    | -37.1761    | -37.1761 | 0.00%           |
| Si <sub>5</sub> Ge <sub>3</sub>    | -36.4005    | -36.4005 | 0.00%           |
| Si <sub>4</sub> Ge <sub>4</sub> -A | -35.5916    | -35.5916 | 0.00%           |
| Si <sub>4</sub> Ge <sub>4</sub> -B | -35.6527    | -35.6527 | 0.00%           |
| Si <sub>3</sub> Ge <sub>5</sub>    | -34.9149    | -34.9149 | 0.00%           |
| Si <sub>2</sub> Ge <sub>6</sub>    | -34.1827    | -34.1827 | 0.00%           |
| Si <sub>1</sub> Ge <sub>7</sub>    | -33.5084    | -33.5084 | 0.00%           |
| Si <sub>0</sub> Ge <sub>8</sub>    | -32.8419    | -32.842  | 0.01%           |

**Table S2** Li adsorption energy on the T sites of Si<sub>7</sub>Ge<sub>1</sub> in the upper surface.

| Adsorption site | Eads (eV) |
|-----------------|-----------|
| T1              | -1.81     |
| T2              | -1.86     |
| T3              | -1.86     |
| T4              | -1.86     |

**Table S3** Li adsorption energy on the T sites of Si<sub>7</sub>Ge<sub>1</sub> in the lower surface.

| Adsorption site | Eads  |
|-----------------|-------|
| T1              | -1.84 |
| T2              | -1.84 |
| T3              | -1.84 |
| T4              | -1.97 |

**Table S4** Li adsorption energy on 2D Si<sub>x</sub>Ge<sub>y</sub>.

| System                             | E <sub>ads</sub> (eV) |
|------------------------------------|-----------------------|
| Silicene                           | -2.01                 |
| Si <sub>7</sub> Ge <sub>1</sub>    | -2.04                 |
| Si <sub>6</sub> Ge <sub>2</sub>    | -2.01                 |
| Si <sub>5</sub> Ge <sub>3</sub>    | -2.15                 |
| Si <sub>4</sub> Ge <sub>4</sub> -A | -2.01                 |
| Si <sub>4</sub> Ge <sub>4</sub> -B | -2.00                 |
| Si <sub>3</sub> Ge <sub>5</sub>    | -2.03                 |
| Si <sub>2</sub> Ge <sub>6</sub>    | -2.00                 |
| Si <sub>1</sub> Ge <sub>7</sub>    | -2.01                 |
| Germanene                          | -2.01                 |

**Table S5** The relationship between atomic ratio used in our DFT model of 2D Si<sub>y</sub>Ge<sub>z</sub> and the mass ratio used in the experiment.

| Atomic ratio | Si <sub>7</sub> Ge <sub>1</sub>       | Si <sub>6</sub> Ge <sub>2</sub>       | Si <sub>5</sub> Ge <sub>3</sub>       | Si <sub>4</sub> Ge <sub>4</sub> -A    | Si <sub>4</sub> Ge <sub>4</sub> -B    | Si <sub>3</sub> Ge <sub>5</sub>       | Si <sub>2</sub> Ge <sub>6</sub>       | Si <sub>1</sub> Ge <sub>7</sub>       |
|--------------|---------------------------------------|---------------------------------------|---------------------------------------|---------------------------------------|---------------------------------------|---------------------------------------|---------------------------------------|---------------------------------------|
| Mass ratio   | Si <sub>0.73</sub> Ge <sub>0.27</sub> | Si <sub>0.54</sub> Ge <sub>0.46</sub> | Si <sub>0.39</sub> Ge <sub>0.61</sub> | Si <sub>0.28</sub> Ge <sub>0.72</sub> | Si <sub>0.28</sub> Ge <sub>0.72</sub> | Si <sub>0.19</sub> Ge <sub>0.81</sub> | Si <sub>0.11</sub> Ge <sub>0.89</sub> | Si <sub>0.05</sub> Ge <sub>0.95</sub> |

**Table S6** Maximum storage capacity and Li migration energy barrier of 2D anode materials.

| 2D Materials                                  | Theoretical capacity (mAh/g) | Energy barrier (eV) |
|-----------------------------------------------|------------------------------|---------------------|
| GeS <sup>[1]</sup>                            | 256                          | 0.19                |
| V <sub>2</sub> C <sup>[2]</sup>               | 941                          | 0.05                |
| Nb <sub>2</sub> C <sup>[3]</sup>              | 542                          | 0.03                |
| Mo <sub>2</sub> C <sup>[4]</sup>              | 526                          | 0.04                |
| Ti <sub>3</sub> C <sub>2</sub> <sup>[5]</sup> | 319                          | 0.07                |
| graphite <sup>[6]</sup>                       | 372                          | 0.40                |
| BC <sub>7</sub> <sup>[7]</sup>                | 283                          | 1.17                |
| g-CN <sup>[8]</sup>                           | 813                          | -                   |
| BC <sub>3</sub> <sup>[9]</sup>                | 714                          | 0.40                |
| C <sub>2</sub> N <sup>[10]</sup>              | 672                          | 0.03                |
| Stanene <sup>[11]</sup>                       | 226                          | 0.25                |
| TiC <sup>[12]</sup>                           | 447                          | 0.03                |
| TiN <sup>[12]</sup>                           | 433                          | 0.27                |
| SiS <sup>[13]</sup>                           | 446                          | 0.17                |
| SiSe <sup>[13]</sup>                          | 250                          | 0.12                |
| ZnP <sup>[14]</sup>                           | 556                          | 0.56                |
| Antimonene <sup>[15]</sup>                    | 208                          | 0.34                |

## Reference

- [1] ZHOU Y. MX (M = Ge, Sn; X = S, Se) sheets: theoretical prediction of new promising electrode materials for Li ion batteries [J]. *J Mater Chem A*, 2016, 4(28): 10906-13.
- [2] HU J, XU B, OUYANG C, et al. Investigations on V<sub>2</sub>C and V<sub>2</sub>CX<sub>2</sub> (X = F, OH) Monolayer as a Promising Anode Material for Li Ion Batteries from First-Principles Calculations [J]. *J Phys Chem C*, 2014, 118(42): 24274-81.
- [3] HU J, XU B, OUYANG C, et al. Investigations on Nb<sub>2</sub>C monolayer as promising anode material for Li or non-Li ion batteries from first-principles calculations [J]. *RSC Adv*, 2016, 6(33): 27467-74.

- [4] ÇAKIR D, SEVIK C, GÜLSEREN O, et al. Mo<sub>2</sub>C as a high capacity anode material: a first-principles study [J]. *J Mater Chem A*, 2016, 4(16): 6029-35.
- [5] TANG Q, ZHOU Z, SHEN P. Are MXenes Promising Anode Materials for Li Ion Batteries? Computational Studies on Electronic Properties and Li Storage Capability of Ti<sub>3</sub>C<sub>2</sub> and Ti<sub>3</sub>C<sub>2</sub>X<sub>2</sub> (X = F, OH) Monolayer [J]. *J Am Chem Soc*, 2012, 134(40): 16909-16.
- [6] YU T, ZHANG S, LI F, et al. Stable and metallic two-dimensional TaC<sub>2</sub> as an anode material for lithium-ion battery [J]. *J Mater Chem A*, 2017, 5(35): 18698-706.
- [7] DAS D, HARDIKAR R P, HAN S S, et al. Monolayer BC<sub>2</sub>: an ultrahigh capacity anode material for Li ion batteries [J]. *Phys Chem Chem Phys*, 2017, 19(35): 24230-9.
- [8] HANKEL M, SEARLES D J. Lithium storage on carbon nitride, graphenylene and inorganic graphenylene [J]. *Phys Chem Chem Phys*, 2016, 18(21): 14205-15.
- [9] LIU Y, ARTYUKHOV V I, LIU M, et al. Feasibility of Lithium Storage on Graphene and Its Derivatives [J]. *J Phys Chem Lett*, 2013, 4(10): 1737-42.
- [10] ZHANG J, LIU G, HU H, et al. Graphene-like carbon-nitrogen materials as anode materials for Li-ion and mg-ion batteries [J]. *Appl Surf Sci*, 2019, 487: 1026-32.
- [11] MORTAZAVI B, DIANAT A, CUNIBERTI G, et al. Application of silicene, germanene and stanene for Na or Li ion storage: A theoretical investigation [J]. *Electrochim Acta*, 2016, 213: 865-70.
- [12] FAN D, LU S, GUO Y, et al. Two-Dimensional Tetragonal Titanium Carbide: a High-Capacity and High-Rate Battery Material [J]. *J Phys Chem C*, 2018, 122(27): 15118-24.
- [13] KARMAKAR S, CHOWDHURY C, DATTA A. Two-Dimensional Group IV Monochalcogenides: Anode Materials for Li-Ion Batteries [J]. *J Phys Chem C*, 2016, 120(27): 14522-30.
- [14] MORTAZAVI B, BAFEKRY A, SHAHROKHI M, et al. ZnN and ZnP as novel graphene-like materials with high Li-ion storage capacities [J]. *Materials Today Energy*, 2020, 16: 100392.
- [15] SENGUPTA A, FRAUENHEIM T. Lithium and sodium adsorption properties of monolayer antimonene [J]. *Materials Today Energy*, 2017, 5: 347-54.
